# Supplementary material for: Genetic Diversity and Dispersal of DENGUE Virus among Three Main Island Groups of the Philippines during 2015–2017
Source: MDPI journal article supplement (doi:10.3390/v15051079), 2023-04-28
Supplement: s1 [file s1]

**Table S3: Serotype-specific primers used for amplification and sequencing of the envelope protein gene.**

**(a) PCR amplification primers**

| Serotype | Primer      | Sequence (5' – 3')      | Genome position | Product size (bp) |
|----------|-------------|-------------------------|-----------------|-------------------|
| DENV-1   | Den1 819F   | TGAGACACCCAGGATTCAC     | 819-837         | 1780              |
|          | Den1 2598RN | GCTGATCGWATTCCACACAC    | 2579-2598       |                   |
| DENV-2   | Den2 771F   | ACATGGATGTCRTCAGAAGG    | 771-790         | 1770              |
|          | Den2 2540R  | GAAGGGGATTCTGGTTGG      | 2523-2540       |                   |
| DENV-3   | Den3 793F   | AGTCGAGAAGTAGAGACATGG   | 793-813         | 1711              |
|          | Den3 2503R  | CTCTGTCCAGGTGTGGACCT    | 2484-2503       |                   |
| DENV-4   | Den4 613F   | ATYCCGAACCTGAAGACATTGA  | 613-634         | 1907              |
|          | Den4 2519R  | TACTGRTCTGTCCAAGTGTGCAC | 2497-2519       |                   |

**(b) Sequencing primers**

| Serotype | Primer      | Sequence (5' – 3')        |
|----------|-------------|---------------------------|
| DENV-1   | Den1 819F   | TGAGACACCCAGGATTCAC       |
|          | Den1 1102F  | CGYAAACTGTGCATTGAAGC      |
|          | Den1 1710R  | GCTCCTTCTTGTGATCCTAGTAC   |
|          | Den1 1668F  | CGAAGAAGCAGGAAGTAGTCG     |
|          | Den1 2598RN | GCTGATCGWATTCCACACAC      |
| DENV-2   | Den2 771F   | ACATGGATGTCRTCAGAAGG      |
|          | Den2 1353F  | GTGATAACACCTCACTCAGGG     |
|          | Den2 1596R  | CCATGGTAACGGCAGGTC        |
|          | Den2 2540R  | GAAGGGGATTCTGGTTGG        |
| DENV-3   | Den3 793F   | AGTCGAGAAGTAGAGACATGG     |
|          | Den3 1307F  | ATAGAGGGAAAAGTGGTGCA      |
|          | Den3 1867R  | GGAGACTTCTTTCTTCAACACAAA  |
|          | Den3 2503R  | CTCTGTCCAGGTGTGGACCT      |
| DENV-4   | Den4 613F   | ATYCCGAACCTGAAGACATTGA    |
|          | Den4 1939R  | TTACACGGAGCTCCAGYACCTTCAT |
|          | Den4 1462F  | YARCGGACTATGGAGAAAYTAACAC |
|          | Den4 2519R  | TACTGRTCTGTCCAAGTGTGCAC   |
