# Supplementary material for: Genetic Diversity and Dispersal of DENGUE Virus among Three Main Island Groups of the Philippines during 2015–2017
Source: MDPI journal article supplement (doi:10.3390/v15051079), 2023-04-28
Supplement: s1 [file s1]

**Table S2. Bayes factor values of diffusion pathways for DENV serotypes**

| Serotype         | Geographical connections for diffusion pathways |    |     |      |   |     |    |      |         |     |      |          |   |    |     |      |     | Bayes Factor value |
|------------------|-------------------------------------------------|----|-----|------|---|-----|----|------|---------|-----|------|----------|---|----|-----|------|-----|--------------------|
|                  | Luzon                                           |    |     |      |   |     |    |      | Visayas |     |      | Mindanao |   |    |     |      |     |                    |
|                  | I                                               | II | III | IV-A | V | XIV | XV | XVII | VI      | VII | VIII | IX       | X | XI | XII | XIII | XVI |                    |
| DENV-1<br>(n=10) |                                                 |    |     |      |   | Y   | Y  |      |         |     |      |          |   |    |     |      |     | 349.58             |
|                  |                                                 |    | Y   | Y    |   |     |    |      |         |     |      |          |   |    |     |      |     | 13.59              |
|                  |                                                 |    |     |      |   |     |    |      |         |     |      |          |   | Y  | Y   |      |     | 10.06              |
|                  |                                                 |    |     | Y    |   |     | Y  |      |         |     |      |          |   |    |     |      |     | 9.43               |
|                  |                                                 | Y  |     |      |   |     | Y  |      |         |     |      |          |   |    |     |      |     | 7.39               |
|                  |                                                 |    |     |      |   |     |    | Y    |         |     |      |          |   |    |     | Y    |     | 5.07               |
|                  |                                                 |    |     |      |   |     |    |      |         |     |      |          |   | Y  |     | Y    |     | 4.24               |
|                  |                                                 | Y  |     | Y    |   |     |    |      |         |     |      |          |   |    |     |      |     | 4.22               |
|                  |                                                 |    |     |      |   |     |    | Y    |         |     |      |          |   | Y  |     |      |     | 4.07               |
|                  |                                                 |    |     | Y    |   |     |    |      |         |     | Y    |          |   |    |     |      |     | 3.63               |
| DENV-2<br>(n=9)  | Y                                               |    |     |      |   |     | Y  |      |         |     |      |          |   |    |     |      |     | 6.65               |
|                  |                                                 |    |     | Y    |   |     | Y  |      |         |     |      |          |   |    |     |      |     | 5.90               |
|                  |                                                 |    | Y   |      |   |     | Y  |      |         |     |      |          |   |    |     |      |     | 4.60               |
|                  |                                                 |    |     |      |   |     | Y  | Y    |         |     |      |          |   |    |     |      |     | 4.42               |
|                  |                                                 |    |     |      |   |     |    |      |         |     | Y    |          |   | Y  |     |      |     | 4.22               |
|                  |                                                 |    | Y   |      |   | Y   |    |      |         |     |      |          |   |    |     |      |     | 3.86               |
|                  |                                                 |    | Y   | Y    |   |     |    |      |         |     |      |          |   |    |     |      |     | 3.25               |
|                  |                                                 |    | Y   |      |   |     |    | Y    |         |     |      |          |   |    |     |      |     | 3.04               |
|                  |                                                 |    |     | Y    |   | Y   |    |      |         |     |      |          |   |    |     |      |     | 3.03               |
| DENV-3<br>(n=11) |                                                 |    |     |      |   | Y   |    |      |         |     | Y    |          |   |    |     |      |     | 424.96             |
|                  |                                                 |    |     |      |   |     |    |      |         |     |      |          |   |    | Y   |      | Y   | 23.76              |
|                  |                                                 |    |     |      |   |     |    |      |         |     |      |          |   | Y  | Y   |      |     | 18.25              |
|                  |                                                 |    |     | Y    |   | Y   |    |      |         |     |      |          |   |    |     |      |     | 9.36               |
|                  |                                                 |    |     |      |   | Y   |    |      | Y       |     |      |          |   |    |     |      |     | 8.17               |
|                  |                                                 |    |     |      |   |     |    |      |         |     | Y    |          |   |    |     |      |     | 8.17               |
|                  |                                                 |    | Y   |      |   |     |    |      | Y       |     |      |          |   | Y  |     |      |     | 6.45               |

| Serotype        | Geographical connection |    |     |      |   |     |    |         |    |     |          |    |   |    |     |      |     | Bayes Factor value |
|-----------------|-------------------------|----|-----|------|---|-----|----|---------|----|-----|----------|----|---|----|-----|------|-----|--------------------|
|                 | Luzon                   |    |     |      |   |     |    | Visayas |    |     | Mindanao |    |   |    |     |      |     |                    |
|                 | I                       | II | III | IV-A | V | XIV | XV | XVII    | VI | VII | VIII     | IX | X | XI | XII | XIII | XVI |                    |
| DENV-3          |                         |    |     | Y    |   |     |    |         |    |     | Y        |    |   |    |     |      |     | 5.96               |
|                 |                         |    |     |      | Y |     |    | Y       |    |     |          |    |   |    |     |      |     | 5.65               |
|                 |                         |    |     |      | Y |     |    |         | Y  |     |          |    |   |    |     |      |     | 5.17               |
|                 |                         |    |     |      |   |     | Y  |         | Y  |     |          |    |   |    |     |      |     | 3.67               |
| DENV-4<br>(n=4) |                         |    |     |      |   |     |    | Y       |    |     |          |    |   |    |     |      | Y   | 10.76              |
|                 |                         |    |     |      |   |     |    |         |    |     |          |    |   |    | Y   | Y    |     | 5.05               |
|                 |                         |    |     | Y    |   |     |    |         | Y  |     |          |    |   |    |     |      |     | 3.55               |
|                 |                         |    |     |      |   |     |    |         |    |     |          | Y  |   |    |     |      | Y   | 3.10               |

In each row, “Y” indicates two regions connected by each diffusion pathway. Table shows only the diffusion links with Bayes factor values greater than 3. I= Ilocos Region; II=Cagayan Valley; III=Central Luzon; IV-A=CALABARZON; V=Bicol Region; VI=Western Visayas; VII=Central Visayas; VIII=Eastern Visayas; IX=Zamboanga Peninsula; X=Northern Mindanao; XI=Davao Region; XII=SOCCSKSARGEN; XIII=Caraga Region; XIV=National Capital Region (NCR); XV=Cordillera Administrative Region (CAR); XVI=Autonomous Region in Muslim Mindanao (ARMM); XVII=MIMAROPA Region.
