# Supplementary material for: Genetic Diversity and Dispersal of DENGUE Virus among Three Main Island Groups of the Philippines during 2015–2017
Source: MDPI journal article supplement (doi:10.3390/v15051079), 2023-04-28
Supplement: s1 [file s1]

**Table S1: Selection pressure analysis of unique and novel *E* gene substitutions found in different clades**

| Serotype | Clade                  | Substitution   | Selection pressure analysis method <sup>‡</sup> |                            |                        |                         |       |
|----------|------------------------|----------------|-------------------------------------------------|----------------------------|------------------------|-------------------------|-------|
|          |                        |                | SLAC                                            | FEL                        | IFEL                   | FUBAR                   | MEME  |
| DENV-2   | Cosmopolitan (clade a) | E-K160T        | Neutral (0.473)                                 | Neutral (0.866)            | Neutral (0.75)         | Neutral (0.612)         | 0.06  |
|          | Cosmopolitan (clade b) | E-H346Q        | Negative (0.004)                                | Neutral (0.057)            | Neutral (0.13)         | Negative (0.98)         | 0.53  |
|          | Cosmopolitan (clade a) | <b>E-I379V</b> | <b>Negative (0.0001)</b>                        | <b>Negative (&lt;0.05)</b> | <b>Negative (0.01)</b> | <b>Negative (1)</b>     | 0.30  |
| DENV-3   | Genotype I (clade c)   | <b>E-L430I</b> | <b>Negative (0.046)</b>                         | <b>Negative (0.002)</b>    | Neutral (0.08)         | <b>Negative (0.997)</b> | >1.00 |
| DENV-4   | Genotype II (clade b)  | E-D274E        | Neutral (0.653)                                 | Neutral (0.543)            | Neutral (0.60)         | Neutral (0.608)         | 0.23  |

<sup>‡</sup>Implemented in HyPhy software package implemented in the Datamonkey web-server [39]. Residues under purifying (negative) selection are shown in bold letters. These non-neutral residues were confirmed by at least three methods (significant levels were defined as posterior probability value of  $\Rightarrow 0.9$  for FUBAR and p-values  $\Rightarrow 0.05$  for the remaining methods). FEL=fixed effects likelihood; IFEL=internal fixed effect likelihood; FUBAR=fast unbiased Bayesian approximation; MEME=mixed effect model of evolution; SLAC= Single likelihood ancestor counting.
