# Supplementary material for: Genetic Diversity and Dispersal of DENGUE Virus among Three Main Island Groups of the Philippines during 2015–2017
Source: Viruses. 2023 Apr 28;15(5):1079. doi: 10.3390/v15051079 (PMC10223597; doi:10.3390/v15051079)
Supplement: Supplementary file 1 [file viruses-15-01079-s001.zip]

Archive with 5 entries (5 files):
- Figures S1-S4.pdf
- Figures S5-S8.pdf
- Table S1.pdf
- Table S2.pdf
- Table S3.pdf
